# Supplementary material
Source: MDPI journal article supplement (https://www.mdpi.com/2311-7524/9/4/481)
Supplement: s1 [file s1]

# Composts from Grapevine and Hazelnut By-Products: A Sustainable Peat Partial Replacement for the Growth of Micropropagated Hazelnut and Raspberry in Containers

## Supplementary Materials

Supplementary Table S1. Effects of substrates with different compost ratio (0-10-20-40%) on raspberry Himbo Top plant height during the growth season and on leaf area on DOY 196. Means followed by different letters significantly differ at p-value < 0.05. DOY = day of year. T1 = Commercial Peat (P) 90% + Compost A(CA) 10%; T2 = P 80% + CA 20%; T3 = P 60% + CA 40%; T4= Commercial Peat (P) 100%; T5 = P Commercial Peat 100% + Osmocote.

| Plant height (cm) |     |      |   |      |   |      |   |      |   |       |   | Leaf area (cm²) |        |     |
|-------------------|-----|------|---|------|---|------|---|------|---|-------|---|-----------------|--------|-----|
| Treatment         | DOY | 113  |   | 144  |   | 173  |   | 196  |   | 225   |   | 266             |        | 196 |
| T1                |     | 8.5  | a | 40.2 | a | 85.2 | a | 94.8 | a | 115.2 | a | 113.7           | 2869.3 | ab  |
| T2                |     | 10.4 | a | 33.0 | a | 77.9 | a | 91.0 | a | 112.0 | a | 109.4           | 3488.4 | a   |
| T3                |     | 8.7  | a | 36.0 | a | 79.7 | a | 92.0 | a | 113.2 | a | 113.9           | 3462.1 | a   |
| T4                |     | 8.0  | a | 37.1 | a | 80.7 | a | 84.7 | a | 102.4 | a | 109.3           | 2251.0 | b   |
| T5                |     | 11.1 | a | 36.2 | a | 79.3 | a | 88.1 | a | 105.6 | a | 112.3           | 3115.8 | ab  |

Supplementary Table S2. Chlorophyll (CHL), flavonoids (FLA) and anthocyanins (ANTH) index, and Nitrogen Balance Index (NBI) of raspberry Himbo Top as affected by different compost ratio (0-10-20-40%) at different times during the growing season. Means followed by the same letter do not significantly differ at p-value < 0.05. DOY = Day of Year. T1, Commercial Peat (P) 90% + Compost A(CA) 10%; T2, P 80% + CA 20%; T3, P 60% + CA 40%; T4, Commercial Peat (P) 100%; T5, P 100% + Osmocote.

| Date     | DOY | Treatment | CHL (-) |    | FLAV (-) |    | NBI (-) |    | ANTH (-) |    |
|----------|-----|-----------|---------|----|----------|----|---------|----|----------|----|
| 11th May | 131 | T1        | 21.11   | ab | 0.69     | b  | 30.74   | a  | 0.30     | a  |
|          |     | T2        | 24.10   | a  | 0.95     | a  | 27.08   | a  | 0.23     | c  |
|          |     | T3        | 22.20   | ab | 0.72     | b  | 30.61   | a  | 0.26     | bc |
|          |     | T4        | 19.73   | b  | 0.71     | b  | 27.77   | a  | 0.27     | ab |
|          |     | T5        | 19.72   | b  | 0.72     | b  | 27.23   | a  | 0.283    | ab |
| 4th Jul  | 185 | T1        | 17.38   | ab | 1.07     | bc | 16.33   | b  | 0.36     | a  |
|          |     | T2        | 19.92   | a  | 0.93     | bc | 21.57   | a  | 0.33     | a  |
|          |     | T3        | 20.56   | a  | 0.90     | c  | 23.48   | a  | 0.33     | a  |
|          |     | T4        | 14.93   | b  | 1.34     | a  | 11.38   | c  | 0.37     | a  |
|          |     | T5        | 19.21   | a  | 1.18     | ab | 16.65   | b  | 0.34     | a  |
| 25th Jul | 206 | T1        | 20.32   | a  | 1.23     | ab | 17.52   | ab | 0.33     | ab |
|          |     | T2        | 20.86   | a  | 1.27     | ab | 16.73   | ab | 0.37     | ab |
|          |     | T3        | 21.89   | a  | 1.00     | b  | 22.32   | a  | 0.31     | b  |
|          |     | T4        | 18.54   | a  | 1.09     | b  | 18.82   | ab | 0.34     | ab |
|          |     | T5        | 20.32   | a  | 1.46     | a  | 14.05   | b  | 0.40     | a  |
| 13th Aug | 225 | T1        | 19.97   | a  | 1.29     | a  | 15.94   | a  | 0.39     | a  |
|          |     | T2        | 21.23   | a  | 1.13     | a  | 19.60   | a  | 0.36     | a  |
|          |     | T3        | 21.35   | a  | 1.25     | a  | 17.43   | a  | 0.33     | a  |
|          |     | T4        | 20.63   | a  | 1.30     | a  | 16.76   | a  | 0.36     | a  |
|          |     | T5        | 22.43   | a  | 1.26     | a  | 18.40   | a  | 0.37     | a  |
| 12th Sep | 255 | T1        | 24.11   | a  | 1.23     | a  | 19.63   | a  | 0.28     | a  |
|          |     | T2        | 21.08   | a  | 1.22     | a  | 19.10   | a  | 0.28     | a  |
|          |     | T3        | 21.30   | a  | 1.14     | a  | 17.48   | a  | 0.30     | a  |

|    |       |   |      |   |       |   |      |   |
|----|-------|---|------|---|-------|---|------|---|
| T4 | 24.07 | a | 1.27 | a | 16.51 | a | 0.31 | a |
| T5 | 23.36 | a | 1.10 | a | 20.37 | a | 0.31 | a |

Supplementary Table S3. Effects of substrates with different compost ratio (0-10-20-40%) on hazelnut Tonda Gentile plant height during the growth season and on leaf area on DOY 196. Means followed by different letters significantly differ at p-value < 0.05. DOY = day of year. T1 = Commercial Peat (P) 90% + Compost B (CB) 10%; T2 = P 80% + CB 20%; T3 = P 60% + CB 40%; T4 = Commercial Peat (P) 100%; T5 = P Commercial Peat 100% + Osmocote.

| Treatment<br>DOY | Plant height (cm) |   |      |    |      |    |      |    |      |   |      |   | Leaf area (cm²) |   |
|------------------|-------------------|---|------|----|------|----|------|----|------|---|------|---|-----------------|---|
|                  | 113               |   | 144  |    | 173  |    | 196  |    | 225  |   | 266  |   | 196             |   |
| T1               | 11.5              | a | 22.3 | a  | 36.5 | ab | 46.4 | a  | 49.5 | a | 49.8 | a | 2195.8          | a |
| T2               | 12.3              | a | 19.3 | ab | 28.0 | c  | 34.1 | b  | 35.8 | b | 37.0 | b | 1029.1          | c |
| T3               | 11.7              | a | 16.9 | b  | 17.0 | d  | 23.3 | c  | 25.8 | b | 26.0 | b | 518.4           | d |
| T4               | 11.8              | a | 20.2 | ab | 29.9 | bc | 33.0 | bc | 35.4 | b | 35.7 | b | 1514.7          | b |
| T5               | 11.7              | a | 23.1 | a  | 39.5 | a  | 47.4 | a  | 49.9 | a | 50.2 | a | 1614.2          | b |

Supplementary Table S4. Chlorophyll (CHL), flavonoids (FLA) and anthocyanins (ANTH) index, and Nitrogen Balance Index (NBI) of hazelnut Tonda Gentile as affected by different compost ratio (0-10-20-40%) at different times during the growing season. Means followed by the same letter do not significantly differ at p-value < 0.05. DOY = Day of Year. T1, Commercial Peat (P) 90% + Compost B (CB) 10%; T2, P 80% + CB 20%; T3, P 60% + CB 40%; T4, Commercial Peat (P) 100%; T5, P 100% + Osmocote.

| DOY | Treatment | CHL<br>(-) |    | FLAV<br>(-) |    | NBI<br>(-) |    | ANTH<br>(-) |    |
|-----|-----------|------------|----|-------------|----|------------|----|-------------|----|
| 131 | T1        | 13.63      | a  | 1.09        | bc | 12.70      | a  | 0.31        | a  |
|     | T2        | 14.99      | a  | 1.02        | c  | 14.94      | a  | 0.30        | a  |
|     | T3        | 13.64      | a  | 0.97        | c  | 14.25      | a  | 0.30        | a  |
|     | T4        | 11.82      | a  | 1.19        | b  | 10.01      | a  | 0.31        | a  |
|     | T5        | 13.26      | a  | 1.37        | a  | 9.83       | a  | 0.30        | a  |
| 185 | T1        | 24.06      | a  | 0.88        | b  | 27.75      | a  | 0.27        | c  |
|     | T2        | 23.97      | a  | 0.93        | b  | 25.85      | a  | 0.29        | c  |
|     | T3        |            |    |             |    |            |    |             |    |
|     | T4        | 12.82      | c  | 1.17        | a  | 11.03      | c  | 0.35        | a  |
|     | T5        | 16.78      | b  | 1.13        | a  | 14.97      | b  | 0.33        | b  |
| 206 | T1        | 23.76      | a  | 0.97        | c  | 24.85      | a  | 0.29        | d  |
|     | T2        | 22.01      | a  | 1.08        | bc | 20.78      | ab | 0.31        | cd |
|     | T3        | 17.39      | b  | 0.93        | c  | 18.80      | b  | 0.34        | bc |
|     | T4        | 9.72       | c  | 1.36        | a  | 7.20       | d  | 0.40        | a  |
|     | T5        | 15.14      | b  | 1.25        | ab | 12.55      | c  | 0.35        | b  |
| 225 | T1        | 20.02      | a  | 1.22        | b  | 16.50      | a  | 0.35        | b  |
|     | T2        | 18.18      | a  | 1.21        | b  | 15.21      | a  | 0.33        | b  |
|     | T3        | 18.55      | a  | 1.26        | b  | 15.07      | a  | 0.33        | b  |
|     | T4        | 11.19      | b  | 1.59        | a  | 7.07       | b  | 0.39        | a  |
|     | T5        | 13.44      | b  | 1.62        | a  | 8.51       | b  | 0.33        | b  |
| 255 | T1        | 23.42      | a  | 1.40        | c  | 17.08      | a  | 0.34        | a  |
|     | T2        | 21.97      | ab | 1.57        | bc | 14.16      | a  | 0.28        | a  |
|     | T3        | 19.44      | b  | 1.66        | bc | 12.48      | a  | 0.28        | a  |
|     | T4        | 13.52      | c  | 1.91        | ab | 7.92       | b  | 0.33        | a  |
|     | T5        | 11.28      | c  | 2.25        | a  | 5.06       | b  | 0.29        | a  |
